# Supplementary figures and images for: Oral Microbiome in Relation to Periodontitis Severity and Systemic Inflammation
Source: MDPI journal article supplement (doi:10.3390/ijms22115876), 2021-05-30

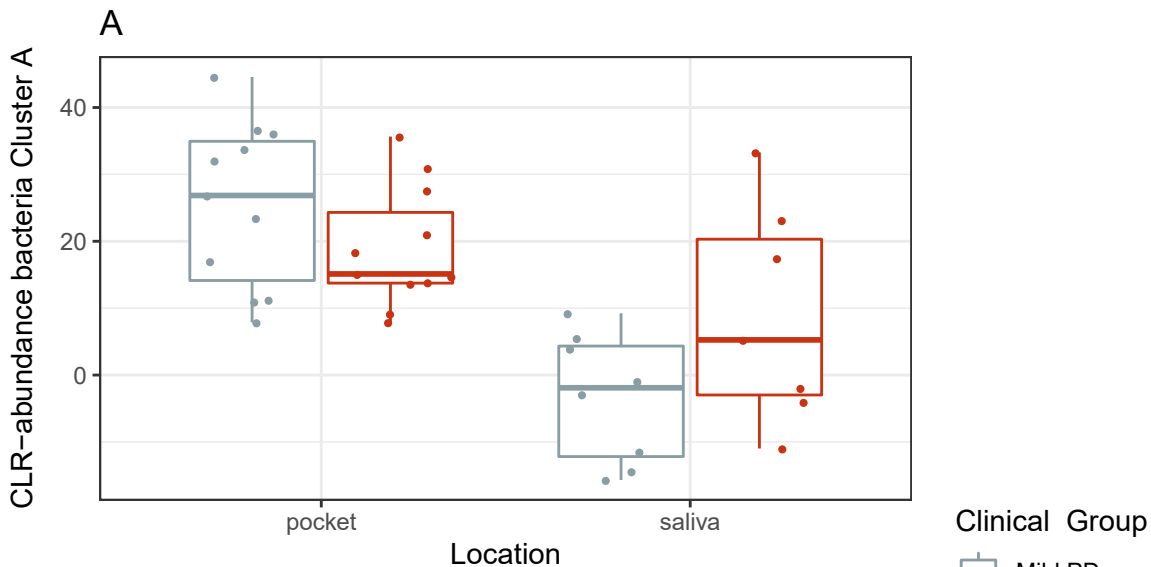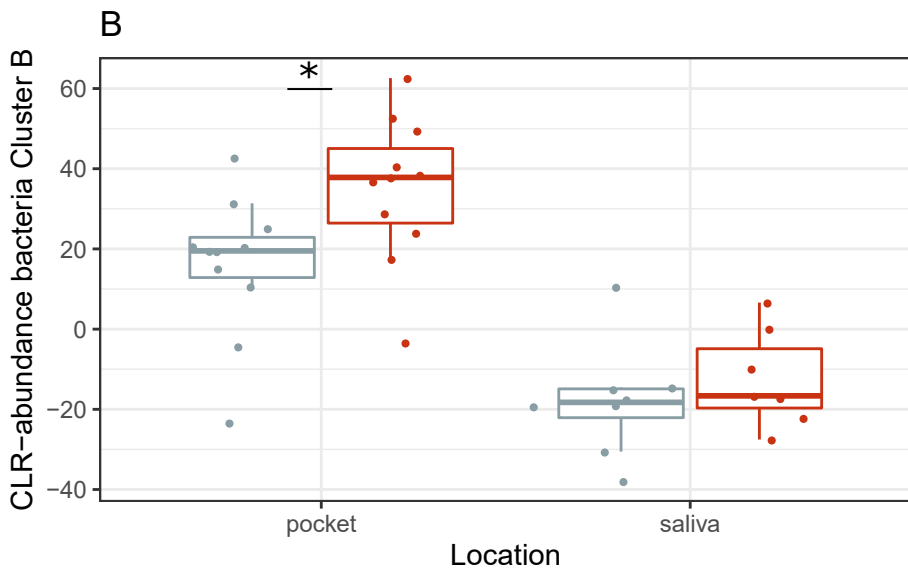

Supplement: s1 [file s1]

a

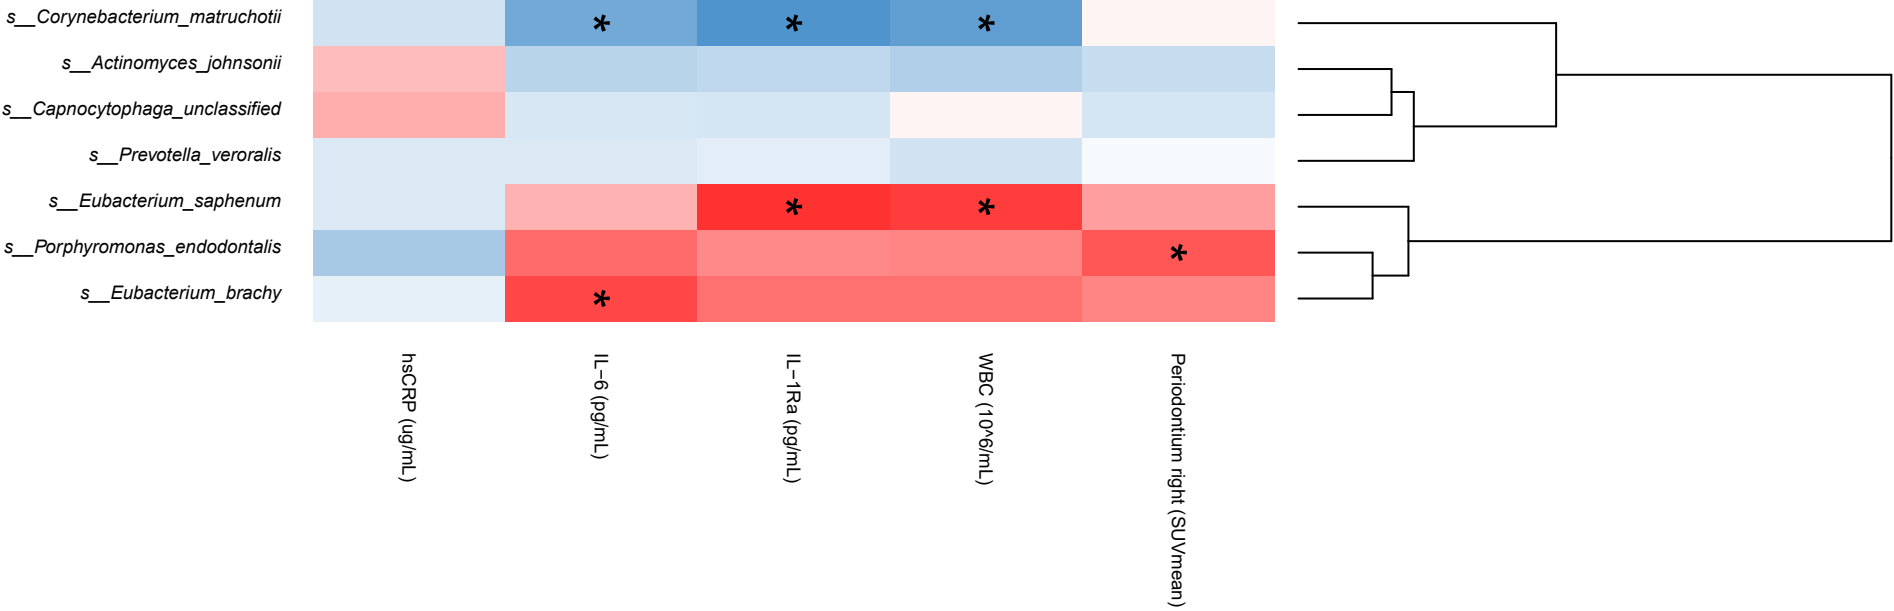

Color Key and Histogram

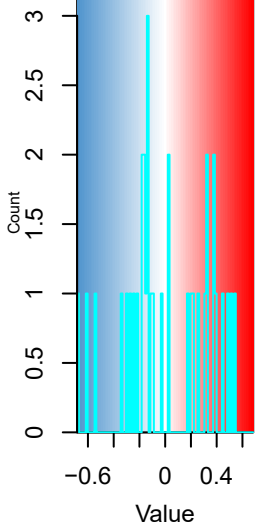

b

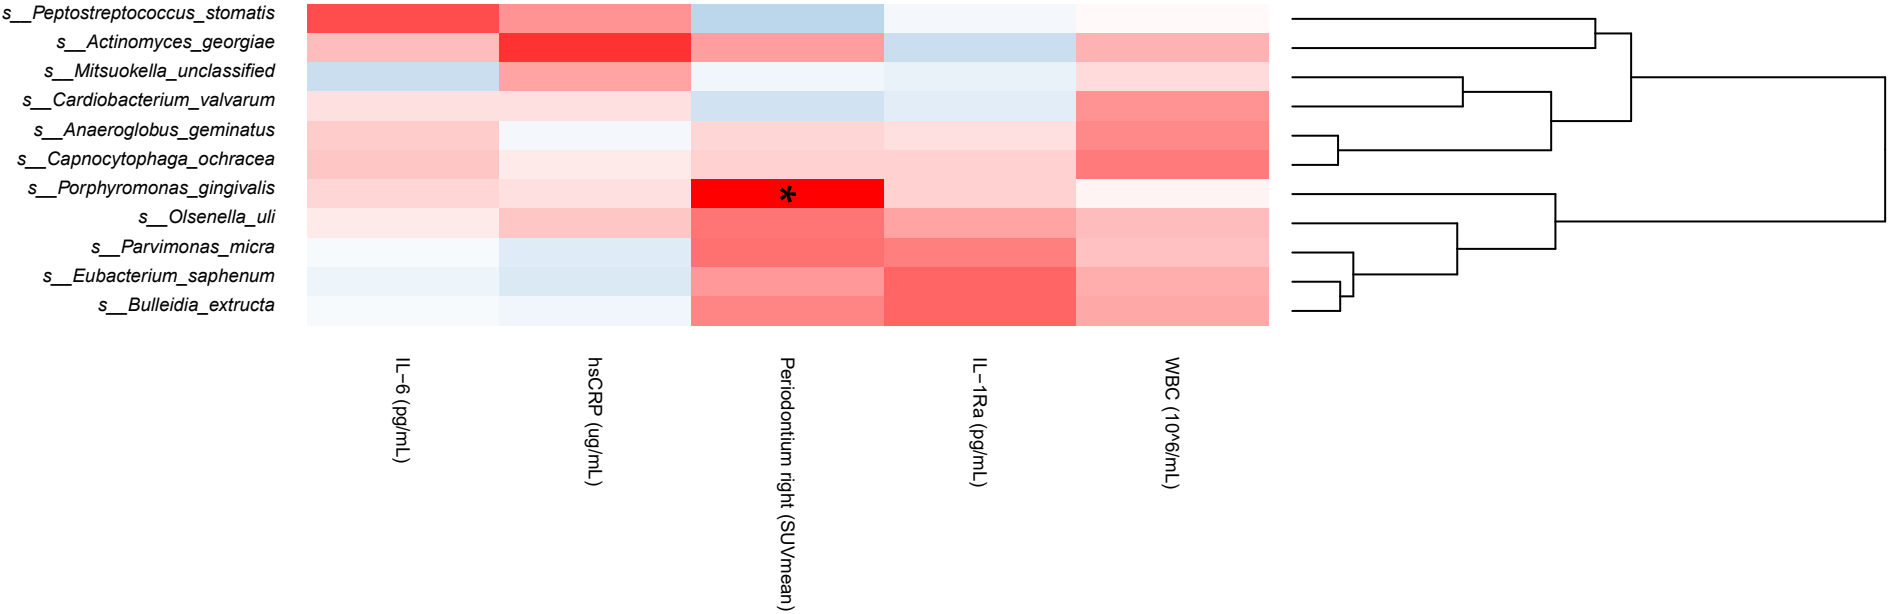

Color Key and Histogram

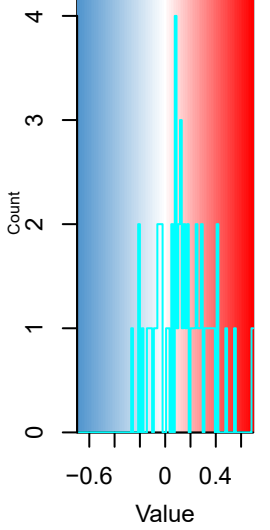

c

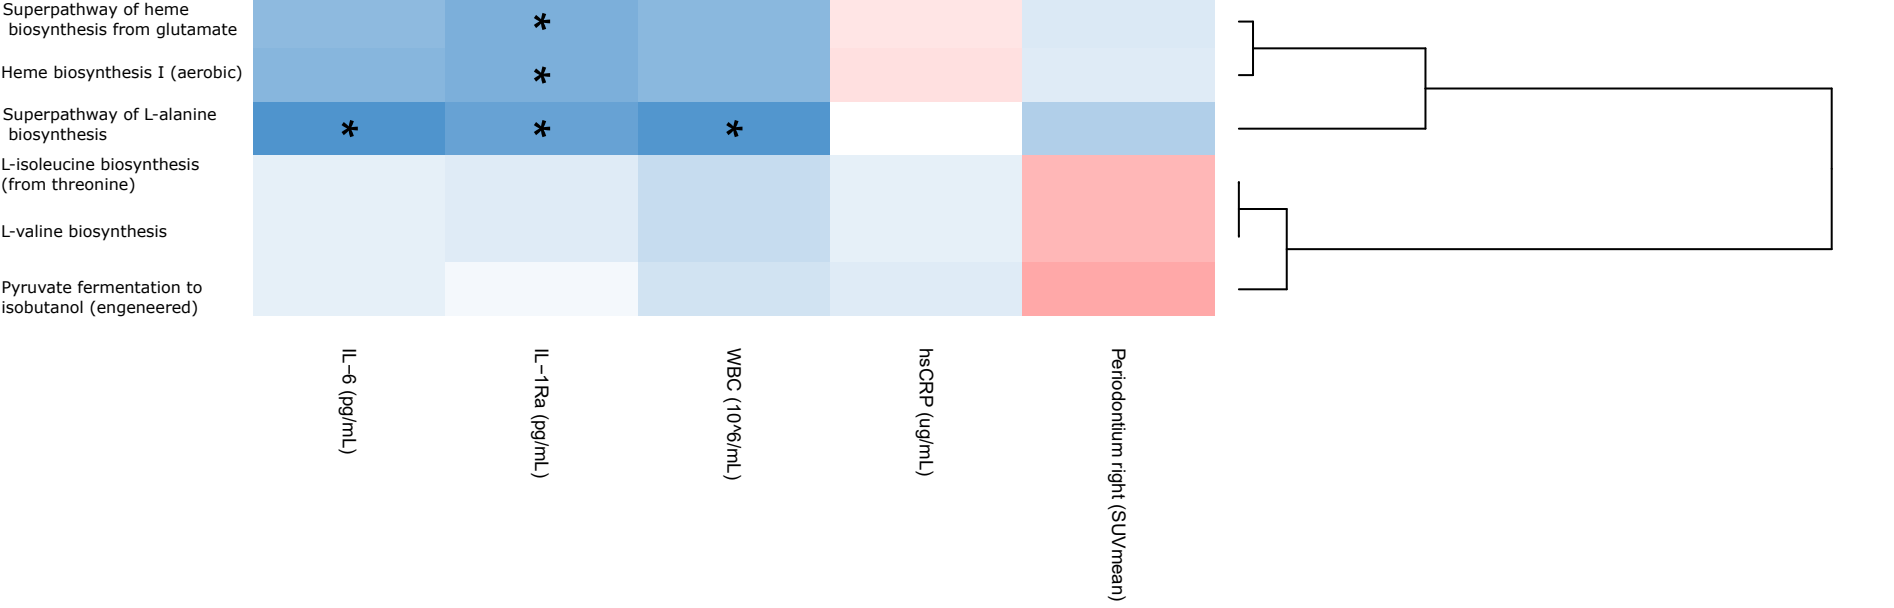

Color Key and Histogram

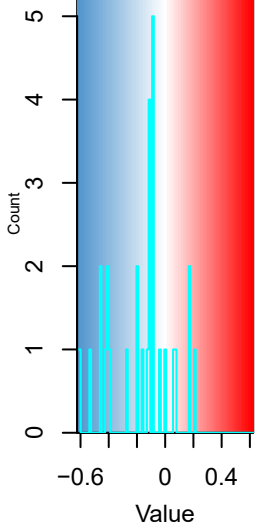

Supplement: s1 [file s1]
